# Supplementary material for: Homeostasis, injury, and recovery dynamics at multiple scales in a self-organizing mouse intestinal crypt
Source: eLife journal article supplement (doi:10.7554/elife.85478), 2023-12-08
Supplement: supp [file elife-85478-supp-v1.zip]

The model code is available through BioModels database (MODEL2212120002)

Louis Gall and Carmen Pin

AstraZeneca.
